# Supplementary material for: Enteroids to Study Pediatric Intestinal Drug Transport
Source: PubMed Central journal article supplement (PMC11462498; doi:10.1021/acs.molpharmaceut.4c00339), 2024-09-16
Supplement: mp4c00339_si_001.pdf [file mp4c00339_si_001.pdf]

## Supplementary

### Enteroids to study pediatric intestinal drug transport

Eva J. Streekstra, Marit Keuper-Navis, Jeroen J.M.W. van den Heuvel, Petra van den Broek, Martijn W.J. Stommel, Willem de Boode, Sanne Botden, Sander Bervoets, Luke O’Gorman, Rick Greupink, Frans G. M. Russel, Evita van de Steeg, Saskia N. de Wildt

Supporting information: additional experimental details material and methods, including donor characteristics, statistics, barrier integrity, apparent permeability values per donor and additional RNAseq PCA and gene expression.

Supplementary Table 1: compositions of buffers and media used in enteroid culture

| Solution                               | Components                                          | End concentration | Supplier                                      |
|----------------------------------------|-----------------------------------------------------|-------------------|-----------------------------------------------|
| <b>Storage Buffer</b>                  | Williams' E                                         |                   | Gibco, Thermo Fisher Scientific, Walthman, MA |
|                                        | Glucose                                             | 2.8 mg/mL         | Sigma-Aldrich, Burlington, MA                 |
|                                        | Amphotericin B                                      | 2.5 µg/mL         | Gibco, Thermo Fisher Scientific, Walthman, MA |
|                                        | Gentamicin                                          | 500 µg/mL         | Gibco, Thermo Fisher Scientific, Walthman, MA |
|                                        | GlutaMAX                                            | 2mM               | Gibco, Thermo Fisher Scientific, Walthman, MA |
|                                        | HEPES                                               | 10mM              | Gibco, Thermo Fisher Scientific, Walthman, MA |
| <b>Wash Buffer</b>                     | PBS                                                 |                   | Gibco, Thermo Fisher Scientific, Walthman, MA |
|                                        | Pen/Strep                                           | 100 U/mL          | Gibco, Thermo Fisher Scientific, Walthman, MA |
|                                        | Gentamicin                                          | 500 µg/mL         | Gibco, Thermo Fisher Scientific, Walthman, MA |
|                                        | Amphotericin B                                      | 2,5 µg/mL         | Gibco, Thermo Fisher Scientific, Walthman, MA |
|                                        | Primocin                                            | 50 µg/mL          | Invitrogen, Carlsbad, CA                      |
| <b>Crypt releasing solution</b>        | Wash buffer                                         |                   | See above                                     |
|                                        | EDTA                                                | 4 mM              | Sigma-Aldrich, Burlington, MA                 |
|                                        | DTT                                                 | 2 mM              | Roche, Basel, Switzerland                     |
| <b>Advance DMEM +++</b>                | Advanced DMEM                                       |                   | Gibco, Thermo Fisher Scientific, Walthman, MA |
|                                        | Pen/strep                                           | 100 U/mL          | Gibco, Thermo Fisher Scientific, Walthman, MA |
|                                        | Glutamax                                            | 2 mM              | Gibco, Thermo Fisher Scientific, Walthman, MA |
|                                        | HEPES                                               | 10 mM             | Gibco, Thermo Fisher Scientific, Walthman, MA |
| <b>Organoid Growth Medium</b>          | IntestiCult Organoid Growth Medium (Human)          |                   | STEMCELL™ Technologies, Vancouver, BC, Canada |
|                                        | IntestiCult Supplements                             |                   | STEMCELL™ Technologies, Vancouver, BC, Canada |
|                                        | Pen/Strep                                           | 100 U/mL          | Gibco, Thermo Fisher Scientific, Walthman, MA |
|                                        | Rock-inhibitor (Y-27632)*                           | 10 µM             | STEMCELL™ Technologies, Vancouver, BC, Canada |
| <b>Organoid Differentiation Medium</b> | IntestiCult Organoid Differentiation Medium (Human) |                   | STEMCELL™ Technologies, Vancouver, BC, Canada |
|                                        | IntestiCult Organoid Supplements                    |                   | STEMCELL™ Technologies, Vancouver, BC, Canada |
|                                        | Pen/Strep                                           | 100 U/mL          | Gibco, Thermo Fisher Scientific, Walthman, MA |
|                                        | DAPT                                                | 5 µM              | STEMCELL™ Technologies, Vancouver, BC, Canada |
| <b>Coating solution</b>                | Acetic acid                                         | 0.1%              | Sigma-Aldrich, Burlington, MA                 |
|                                        | Rat tail Collagen Type 1                            | 100 µg/mL         | Ibidi, Fitchburg, WI                          |
| <b>Transport buffer</b>                | HBSS                                                |                   | Sigma-Aldrich, Burlington, MA                 |
|                                        | HEPES                                               | 10 mM             | Gibco, Thermo Fisher Scientific, Walthman, MA |
|                                        | Glutamax                                            | 2 mM              | Gibco, Thermo Fisher Scientific, Walthman, MA |

\*addition of rock-inhibitor the first 3 days after isolation, monolayer seeding or thawing of enteroids

Supplementary Table 2: donor characteristics. \* & \*\*: same donor included at different age points.

| Age (weeks) | Intestinal Region              | Gestational age | (Previous) disease state                 | Type of surgery                          | Gender | Transport experiment | RNA sequencing     |
|-------------|--------------------------------|-----------------|------------------------------------------|------------------------------------------|--------|----------------------|--------------------|
| 0.29        | Ileum                          | 34+6            | Ileum volvulus (obstruction)             | Continuity recovery                      | Female | Enteroids            | Tissue + Enteroids |
| 4.57        | Mid Ileum                      | 34+5            | Previous NEC perforation                 | Laparotomy to correct inguinal hernia    | Male   | Enteroids            | Tissue + Enteroids |
| 7.29        | Distal ileum (50cm voor colon) | Term            | Colon Hirschsprung                       | Intestinal resection. Stoma construction | Male   | Enteroids            | Enteroids          |
| 13.00       | Terminal ileum                 | 31+0            | Previous NEC 2B                          | Stoma closure surgery                    | Male   | Enteroids            | Tissue + Enteroids |
| 14.14       | Ileum                          | 25+2            | Previous NEC 3B                          | Stoma closure surgery                    | Male   | -                    | Tissue             |
| 15.00       | Ileum                          | unknown         | Colon Hirschsprung                       | Stoma closure surgery                    | Male   | Tissue               | -                  |
| 23.43       | Terminal ileum                 | 39+5            | Meconium peritonitis. Colon Hirschsprung | Stoma closure surgery                    | Female | Tissue               | Tissue             |
| 32.14       | Ileum                          | Term 40         | Meckel's diverticulum                    | Small intestine resection                | Male   | Tissue               | Tissue             |
| 32.29*      | Terminal ileum                 | 37+2            | Previous atypical NEC                    | Ileostomy revision                       | Male   | -                    | Tissue             |
| 37.42       | Ileum                          | 29+1            | Meconium plug                            | Stoma closure surgery                    | Male   | Tissue               | Tissue + Enteroids |
| 38.57       | Terminal ileum                 | 39+0            | Hirschsprung                             | Stoma closure surgery                    | Female | Enteroids            | Tissue + Enteroids |
| 40.29       | Ileum                          | unknown         | Hirschsprung                             | Stoma closure surgery                    | Male   | Enteroids            | Tissue + Enteroids |
| 40.85**     | Terminal ileum                 | 32+1            | Previous NEC                             | Stoma closure surgery                    | Female | Tissue               | Tissue             |
| 41.43*      | Ileum                          | 37+2            | Previous atypical NEC, colon ischemia    | Stoma closure surgery                    | Male   | Tissue + Enteroids   | Tissue + Enteroids |
| 43.86       | Ileum                          | 32+2            | Previous NEC 2B                          | Stoma closure surgery                    | Male   | -                    | Tissue             |
| 45.14**     | Ileum                          | 32+1            | Previous NEC                             | Ileostomy revision                       | Female | -                    | Tissue             |
| 45.29       | Ileum                          | 25+0            | Previous NEC. Short bowel syndrome       | Stoma closure surgery                    | Male   | Enteroids            | Tissue + Enteroids |
| 54.14       | Terminal ileum                 | 31+5            | Previous NEC 3B                          | Stoma closure surgery                    | Male   | Enteroids            | Tissue + Enteroids |
| 56.29       | Ileum                          | 32+2            | Previous NEC 3B                          | Stoma closure surgery                    | Female | Tissue + Enteroids   | Tissue + Enteroids |
| 56.57       | Terminal Ileum                 | 25+0            | Meconium plug                            | Stoma closure surgery                    | Female | Tissue               | Tissue + Enteroids |
| 56.86       | Ileum                          | unknown         | Mesenterial cyst                         | Stoma closure surgery                    | Female | -                    | Tissue + Enteroids |
| 62.71       | Ileum                          | Term 40+6       | Distal ileum atresia. Hirschsprung       | Stoma closure surgery                    | Female | Tissue               | Tissue             |
| 63.86**     | Ileum                          | 32+1            | Previous NEC                             | Ileostomy revision                       | Female | -                    | Tissue             |

|         |                |         |                                                  |                        |        |                    |                    |
|---------|----------------|---------|--------------------------------------------------|------------------------|--------|--------------------|--------------------|
| 273.57  | Terminal ileum | unknown | Colon Hirschsprung                               | Stoma closure surgery  | Male   | Tissue + Enteroids | Tissue + Enteroids |
| 318.00  | Terminal ileum | unknown | Colon Hirschsprung                               | Stoma closure surgery  | Male   | -                  | Tissue             |
| 506.57  | Terminal ileum | 37+4    | Gastroschisis                                    | Stoma closure surgery  | Female | -                  | Tissue             |
| 554.86  | Ileum          | 31+3    | Obstipation caused by underlying genetic disease | Stoma construction     | Female | Tissue             | Tissue             |
| 648.00  | Terminal ileum | unknown | Obstipation caused by underlying genetic disease | Sigmoid resection      | Male   | Enteroids          | Tissue + Enteroids |
| 687.86  | Terminal ileum | unknown | Crohn's diseases                                 | Stoma closure surgery  | Female | Enteroids          | Tissue + Enteroids |
| Adult 1 | Terminal ileum | -       | Colon carcinoma                                  | (right-hemi) colectomy | -      | Tissue             | Tissue + Enteroids |
| Adult 2 | Terminal ileum | -       | Colon carcinoma                                  | (right-hemi) colectomy | -      | Tissue + Enteroids | Tissue + Enteroids |
| Adult 3 | Terminal ileum | -       | Colon carcinoma                                  | (right-hemi) colectomy | -      | Tissue             | Enteroids          |
| Adult 4 | Terminal ileum | -       | Colon carcinoma                                  | (right-hemi) colectomy | -      | Tissue             | Tissue + Enteroids |
| Adult 5 | Terminal ileum | -       | Colon carcinoma                                  | (right-hemi) colectomy | -      | Tissue + Enteroids | Tissue + Enteroids |
| Adult6  | Terminal ileum | -       | Colon carcinoma                                  | (right-hemi) colectomy | -      | Enteroids          | Tissue             |
| Adult 7 | Terminal ileum | -       | Colon carcinoma                                  | (right-hemi) colectomy | -      | Enteroids          | -                  |
| Adult 8 | Terminal ileum | -       | Colon carcinoma                                  | (right-hemi) colectomy | -      | Enteroids          | Tissue + Enteroids |

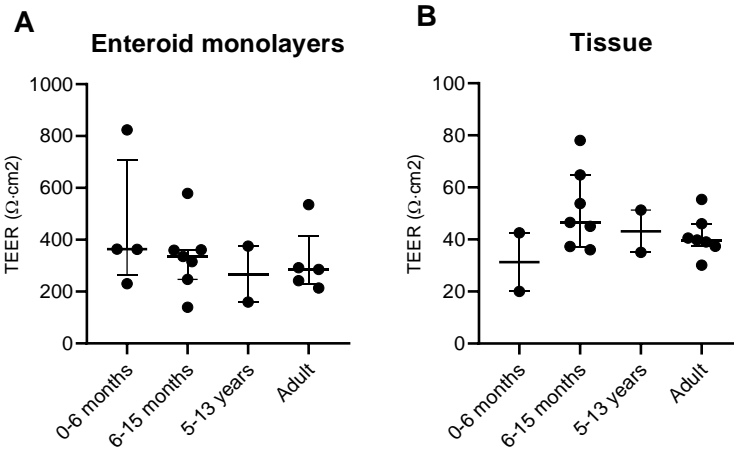

Supplementary Figure 1 Trans epithelial electrical resistance (TEER) in enteroid monolayers (A) and tissue explants in Ussing chamber (B). Data represented in median  $\pm$  IQR.

Supplementary Table 3: apparent permeability values (mean  $\pm$  SD) and efflux ratios per donor in enteroid monolayers

| Age (weeks)   |        | Paracellular – enalaprilat | Transcellular – propranolol | P-gp – talinolol   | BCRP – rosuvastatin |
|---------------|--------|----------------------------|-----------------------------|--------------------|---------------------|
| <b>0.29</b>   | A-to-B | 0.3 $\pm$ 0.2 (3)          | 5 $\pm$ 0.3 (3)             | 0.3 $\pm$ 0.1 (3)  | 0.3 $\pm$ 0.01 (3)  |
|               | B-to-A | 0.5 $\pm$ 0.03 (3)         | 6 $\pm$ 0.3 (3)             | 3 $\pm$ 0.1 (3)    | 3 $\pm$ 0.2 (3)     |
|               | ER     | 2                          | 1                           | 10                 | 13                  |
| <b>4.57</b>   | A-to-B | 0.5 $\pm$ 0.2 (3)          | 5 $\pm$ 0.5 (3)             | 0.4 $\pm$ 0.2 (3)  | 0.4 $\pm$ 0.1 (3)   |
|               | B-to-A | 0.4 $\pm$ 0.1 (3)          | 7 $\pm$ 0.4 (3)             | 4 $\pm$ 0.1 (3)    | 3 $\pm$ 0.1 (3)     |
|               | ER     | 0.7                        | 1                           | 9                  | 9                   |
| <b>7.29</b>   | A-to-B | 0.2 $\pm$ 0.1 (3)          | 11 $\pm$ 0.8 (3)            | 0.2 $\pm$ 0.1 (3)  | 0.2 $\pm$ 0.1 (3)   |
|               | B-to-A | 0.2 $\pm$ 0.01 (3)         | 17 $\pm$ 0.5 (3)            | 5 $\pm$ 0.4 (3)    | 7 $\pm$ 0.5 (3)     |
|               | ER     | 1                          | 2                           | 33                 | 32                  |
| <b>13</b>     | A-to-B | 0.5 $\pm$ 0.1 (3)          | 10 $\pm$ 1.0 (3)            | 0.3 $\pm$ 0.1 (3)  | 0.1 $\pm$ 0.1 (3)   |
|               | B-to-A | 0.9 $\pm$ 0.2 (3)          | 10 $\pm$ 1.1 (3)            | 7 $\pm$ 0.8 (3)    | 6 $\pm$ 0.7 (3)     |
|               | ER     | 2                          | 1                           | 19                 | 45                  |
| <b>37.2</b>   | A-to-B | 0.1 $\pm$ 0.1 (3)          | 5 $\pm$ 0.2 (3)             | 0.2 $\pm$ 0.03 (3) | 0.2 $\pm$ 0.1 (3)   |
|               | B-to-A | 0.2 $\pm$ 0.02 (3)         | 7 $\pm$ 0.5 (3)             | 4 $\pm$ 0.2 (3)    | 4 $\pm$ 0.1 (3)     |
|               | ER     | 3                          | 1                           | 25                 | 22                  |
| <b>38.6</b>   | A-to-B | 0.8 $\pm$ 0.1 (3)          | 12 $\pm$ 1 (3)              | 0.6 $\pm$ 0.1 (3)  | 0.6 $\pm$ 0.1 (3)   |
|               | B-to-A | 0.7 $\pm$ 0.1 (3)          | 13 $\pm$ 0.6 (3)            | 5 $\pm$ 0.3 (3)    | 6 $\pm$ 0.6 (3)     |
|               | ER     | 0.9                        | 1                           | 8                  | 10                  |
| <b>40.29</b>  | A-to-B | 0.4 $\pm$ 0.2 (3)          | 5 $\pm$ 0.1 (3)             | 0.2 $\pm$ 0.1 (3)  | 0.1 $\pm$ 0.1 (3)   |
|               | B-to-A | 0.5 $\pm$ 0.1 (3)          | 7 $\pm$ 0.5 (3)             | 4 $\pm$ 0.2 (3)    | 5 $\pm$ 0.3 (3)     |
|               | ER     | 1                          | 2                           | 21                 | 36                  |
| <b>41.4</b>   | A-to-B | 0.2 $\pm$ 0.03 (3)         | 14 $\pm$ 0.7 (3)            | 0.2 $\pm$ 0.0 (3)  | 0.5 $\pm$ 0.04 (3)  |
|               | B-to-A | 0.3 $\pm$ 0.04 (3)         | 18 $\pm$ 2 (3)              | 9 $\pm$ 1 (3)      | 8 $\pm$ 1 (3)       |
|               | ER     | 1                          | 1                           | 47                 | 18                  |
| <b>45.3</b>   | A-to-B | 0.1 $\pm$ 0.1 (3)          | 8 $\pm$ 0.6 (3)             | 0.1 $\pm$ 0.02 (3) | 0.2 $\pm$ 0.02 (3)  |
|               | B-to-A | 0.2 $\pm$ 0.01 (3)         | 27 $\pm$ 1 (3)              | 11 $\pm$ 0.3 (3)   | 8 $\pm$ 0.3 (3)     |
|               | ER     | 2                          | 4                           | 223                | 56                  |
| <b>54.14</b>  | A-to-B | 0.2 $\pm$ 0.1 (3)          | 11 $\pm$ 1 (3)              | 0.2 $\pm$ 0.2 (3)  | 0.3 $\pm$ 0.1 (3)   |
|               | B-to-A | 0.2 $\pm$ 0 (3)            | 18 $\pm$ 1 (3)              | 7 $\pm$ 0.4 (3)    | 8 $\pm$ 0.6 (3)     |
|               | ER     | 0.7                        | 2                           | 35                 | 31                  |
| <b>56.29</b>  | A-to-B | 0.3 $\pm$ 0.03 (3)         | 5 $\pm$ 0.3 (3)             | 0.3 $\pm$ 0.04 (3) | 0.3 $\pm$ 0.02 (3)  |
|               | B-to-A | 0.4 $\pm$ 0.1 (3)          | 13 $\pm$ 0.6 (3)            | 6 $\pm$ 0.3 (3)    | 4 $\pm$ 0.3 (3)     |
|               | ER     | 1                          | 3                           | 24                 | 14                  |
| <b>273.57</b> | A-to-B | 0.7 $\pm$ 0.2 (3)          | 9 $\pm$ 1 (3)               | 0.7 $\pm$ 0.2 (3)  | 0.5 $\pm$ 0.1 (3)   |
|               | B-to-A | 0.4 $\pm$ 0.2 (3)          | 15 $\pm$ 1 (3)              | 8 $\pm$ 0.6 (3)    | 5 $\pm$ 0.4 (3)     |
|               | ER     | 0.7                        | 2                           | 11                 | 11                  |
| <b>648</b>    | A-to-B | 0.2 $\pm$ 0.03 (2)         | 7 $\pm$ 0.9 (2)             | 0.1 $\pm$ 0.03 (2) | 0.3 $\pm$ 0.03 (2)  |

|                |        |                |              |                 |                |
|----------------|--------|----------------|--------------|-----------------|----------------|
|                | B-to-A | 0.2 ± 0.01 (2) | 23 ± 1 (2)   | 9 ± 0.1 (2)     | 10 ± 0.02 (2)  |
|                | ER     | 1              | 3            | 103             | 31             |
| <b>687.86</b>  | A-to-B | 0.2 ± 0.1 (3)  | 1 ± 0.3 (3)  | 0.1 ± 0.03 (3)  | 0.1 ± 0.02 (3) |
|                | B-to-A | 1 ± 0.1 (3)    | 3 ± 0.2 (3)  | 2 ± 0.2 (3)     | 2 ± 0.2 (3)    |
|                | ER     | 5              | 2            | 21              | 18             |
| <b>Adult 1</b> | A-to-B | 0.04 ± 0.0 (2) | 7 ± 0.02 (2) | 0.04 ± 0.03 (2) | 0.2 ± 0.03 (2) |
|                | B-to-A | 0.1 ± 0.1 (3)  | 18 ± 1.0 (3) | 8 ± 0.4 (3)     | 7 ± 0.5 (3)    |
|                | ER     | 3              | 2            | 192             | 33             |
| <b>Adult 2</b> | A-to-B | 0.3 ± 0.1 (3)  | 7 ± 0.6 (3)  | 0.3 ± 0.1 (3)   | 0.3 ± 0.1 (3)  |
|                | B-to-A | 0.6 ± 0.2 (3)  | 14 ± 1 (3)   | 8 ± 0.2 (3)     | 8 ± 0.6 (3)    |
|                | ER     | 2              | 2            | 19              | 9              |
| <b>Adult 3</b> | A-to-B | 0.3 ± 0.1 (3)  | 7 ± 1 (3)    | 0.1 ± 0.04 (3)  | 0.2 ± 0.1 (3)  |
|                | B-to-A | 0.4 ± 0.1 (3)  | 14 ± 1 (3)   | 8 ± 0.2 (3)     | 8 ± 0.6 (3)    |
|                | ER     | 1              | 2            | 53              | 27             |
| <b>Adult 4</b> | A-to-B | 0.3 ± 0.3 (2)  | 9 ± 0.5 (2)  | 0.2 ± 0.2 (2)   | 0.4 ± 0.3 (2)  |
|                | B-to-A | 0.2 ± 0.2 (3)  | 19 ± 0.3 (3) | 8 ± 0.2 (3)     | 8 ± 0.6 (3)    |
|                | ER     | 1              | 2            | 34              | 20             |
| <b>Adult 5</b> | A-to-B | 0.3 ± 0.01 (3) | 12 ± 4 (3)   | 0.2 ± 0.1 (3)   | 0.4 ± 0.1 (3)  |
|                | B-to-A | 0.4 ± 0.1 (3)  | 14 ± 1 (3)   | 5 ± 0.4 (3)     | 5 ± 0.4 (3)    |
|                | ER     | 2              | 1            | 23              | 13             |

Supplementary Table 4: apparent permeability values (mean ± SD) and efflux ratios per donor in Ussing chamber

| Age (weeks)    |        | Paracellular – enalaprilat | Transcellular – propranolol | P-gp – talinolol | BCRP – rosuvastatin |
|----------------|--------|----------------------------|-----------------------------|------------------|---------------------|
| <b>15.00</b>   | A-to-B | 2 (1)                      | 12 (1)                      | 8 (1)            | 5 (1)               |
|                | B-to-A |                            |                             |                  |                     |
|                | ER     |                            |                             |                  |                     |
| <b>23.43</b>   | A-to-B | 2 (1)                      | 4 (1)                       | 0.7 (1)          | 1 (1)               |
|                | B-to-A | 2 (1)                      | 8 (1)                       | 6 (1)            | 3 (1)               |
|                | ER     | 1                          | 2                           | 9                | 2                   |
| <b>37.42</b>   | A-to-B | 2 ± 0.4 (2)                | 5 ± 2 (2)                   | 7 ± 5 (2)        | 2 ± 0.9 (2)         |
|                | B-to-A | 0.9 ± 0.03(2)              | 6 ± 1 (2)                   | 6 ± 1 (2)        | 4 ± 2 (2)           |
|                | ER     | 0.4                        | 1                           | 0.9              | 2                   |
| <b>40.85</b>   | A-to-B | 1 (1)                      | 7 ± 3 (2)                   | 4 ± 2 (2)        | 6 ± 4.3 (2)         |
|                | B-to-A | 3 ± 0.7 (2)                | 8 ± 2 (2)                   | 8 ± 1 (2)        | 8 ± 0.1 (2)         |
|                | ER     | 2                          | 1                           | 2                | 1                   |
| <b>41.43</b>   | A-to-B |                            | 6 (1)                       |                  | 7 (1)               |
|                | B-to-A | 3 (1)                      | 5 (1)                       | 6 (1)            | 3 (1)               |
|                | ER     |                            | 0.9                         |                  | 0.5                 |
| <b>54.14</b>   | A-to-B | 3 (1)                      | 11 (1)                      | 3 (1)            | 3 (1)               |
|                | B-to-A | 4 ± 0.9 (2)                | 9 ± 0.1 (2)                 | 9 ± 0.4 (2)      | 8 ± 0.8 (2)         |
|                | ER     | 0.3                        | 2                           | 13               | 1                   |
| <b>56.29</b>   | A-to-B | 1 ± 0.7 (3)                | 4 ± 0.7 (3)                 | 2 ± 0.7 (3)      | 1 ± 0.2 (3)         |
|                | B-to-A | 1 (1)                      | 4 (1)                       | 7 (1)            | 3 (1)               |
|                | ER     | 0.8                        | 1                           | 3                | 2                   |
| <b>56.57</b>   | A-to-B |                            |                             |                  |                     |
|                | B-to-A | 4 (1)                      | 2 (1)                       | 2 (1)            | 12 (1)              |
|                | ER     |                            |                             |                  |                     |
| <b>62.71</b>   | A-to-B | 2 ± 0.5 (2)                | 11 ± 8 (2)                  | 3 ± 0.7 (2)      | 2 ± 0.7 (2)         |
|                | B-to-A | 2 (1)                      | 10 (1)                      | 5 (1)            | 1 (1)               |
|                | ER     | 1                          | 0.9                         | 2                | 0.6                 |
| <b>273.57</b>  | A-to-B | 2 (1)                      | 2 ± 1 (2)                   | 0.4 ± 0.2 (2)    | 3 (1)               |
|                | B-to-A | 0.6 (1)                    | 3 ± 2 (2)                   | 5 ± 3 (2)        | 4 (1)               |
|                | ER     | 2                          | 0.7                         | 4                | 4                   |
| <b>554.86</b>  | A-to-B | 2 ± 0.4 (2)                | 16 ± 4 (2)                  | 3 ± 0 (2)        | 3 (1)               |
|                | B-to-A | 4 ± 0.03 (2)               | 11 ± 6 (2)                  | 13 ± 5 (2)       | 12 ± 6 (2)          |
|                | ER     | 1                          | 0.8                         | 4                | 2                   |
| <b>Adult 2</b> | A-to-B |                            |                             |                  |                     |
|                | B-to-A |                            | 2 ± 0.1 (2)                 | 5 ± 3 (2)        | 15 (1)              |
|                | ER     |                            |                             |                  |                     |
| <b>Adult 5</b> | A-to-B | 1 ± 0.2 (3)                | 2 ± 1 (3)                   | 2 ± 1.4 (3)      | 2 ± 0.4 (3)         |
|                | B-to-A | 0.4 ± 0.1 (3)              | 2 ± 0.1 (3)                 | 3 ± 0.3 (3)      | 1 ± 0.4 (3)         |
|                | ER     | 0.3                        | 0.6                         | 1                | 0.7                 |
| <b>Adult 6</b> | A-to-B | 2 (1)                      | 5 ± 2 (2)                   | 2 ± 1 (2)        | 6 ± 1 (2)           |
|                | B-to-A | 2 (1)                      | 3 (1)                       | 7 (1)            | 13 (1)              |
|                | ER     | 1                          | 0.6                         | 4                | 2                   |
| <b>Adult 7</b> | A-to-B | 1 ± 0.01 (2)               | 3 ± 0.1 (2)                 | 0.7 ± 0.2 (2)    | 2 ± 0.1 (2)         |

|         |        |               |             |             |           |
|---------|--------|---------------|-------------|-------------|-----------|
|         | B-to-A | 0.8 ± 0.3 (3) | 1 ± 0.3 (3) | 4 ± 1.2 (3) | 3 ± 1 (3) |
|         | ER     | 0.7           | 0.3         | 6           | 1         |
| Adult 8 | A-to-B | 2 ± 0.7 (3)   | 4 ± 3 (3)   | 2 ± 1 (3)   | 4 ± 1 (3) |
|         | B-to-A | 2 ± 2 (2)     | 2 ± 2 (2)   | 3 ± 3 (2)   | 4 ± 2 (2) |
|         | ER     | 0.8           | 0.6         | 1           | 1         |

Supplementary Table 5: p-values for Spearman correlation of apparent permeability with age of Figure 1 and 2.

|                     |        | Enalaprilat |       | Propranolol |        | Talinolol |       | Rosuvastatin |       |
|---------------------|--------|-------------|-------|-------------|--------|-----------|-------|--------------|-------|
|                     |        | r           | p     | r           | p      | r         | p     | r            | p     |
| Enteroid monolayers | A-to-B | -0.24       | 0.329 | 0.07        | 0.762  | -0.30     | 0.212 | 0.11         | 0.668 |
|                     | B-to-A | -0.11       | 0.644 | 0.45        | 0.056  | 0.41      | 0.079 | 0.09         | 0.713 |
|                     | ER     | 0.18        | 0.456 | 0.52        | 0.021  | 0.43      | 0.065 | -0.03        | 0.917 |
| Tissue              | A-to-B | -0.11       | 0.708 | -0.45       | 0.091  | -0.48     | 0.102 | -0.08        | 0.779 |
|                     | B-to-A | -0.52       | 0.048 | -0.62       | 0.013  | -0.47     | 0.071 | -0.01        | 0.984 |
|                     | ER     | -0.23       | 0.462 | -0.92       | <0.001 | -0.02     | 0.962 | -0.13        | 0.667 |

Supplementary Table 6: p-values of Wilcoxon signed rank test comparing A-to-B with B-to-A transport direction in enteroid monolayers and tissue for all four substrates Figure 1 and 2

|                     | Enalaprilat | Propranolol | Talinolol | Rosuvastatin |
|---------------------|-------------|-------------|-----------|--------------|
| Enteroid monolayers | 0.0531      | <0.0001     | <0.0001   | <0.0001      |
| Tissue              | 0.8945      | 0.2439      | 0.001     | 0.0479       |

Supplementary Table 7: p-values of Mann Withey t-test comparing apparent permeability in enteroid monolayers with tissue

|        | Enalaprilat | Propranolol | Talinolol | Rosuvastatin |
|--------|-------------|-------------|-----------|--------------|
| A-to-B | <0.0001     | 0.2258      | <0.0001   | <0.0001      |
| B-to-A | 0.0001      | <0.0001     | 0.606     | 0.5448       |

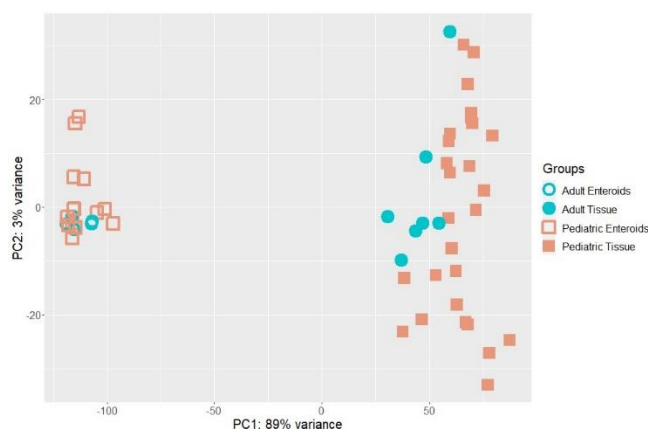

Supplementary Figure 2: Principle component analysis (PCA) of all ileum (pediatric and adult) tissue and enteroid samples included in RNA sequencing. Tissues cluster on the right side n=32 (blue) while enteroid monolayers cluster on the left n=18 (red).

Supplementary Table 8: p-values for Spearman correlation of gene expression with age measured with RNA sequencing (Figure 6)

|                                        | ABCB1        |              | ABCG2        |              | EPCAM        |              | VIL1         |              |
|----------------------------------------|--------------|--------------|--------------|--------------|--------------|--------------|--------------|--------------|
|                                        | r            | p            | r            | p            | r            | p            | r            | p            |
| Tissue                                 | 0.64         | <0.0001      | 0.58         | 0.0003       | 0.47         | 0.005        | 0.63         | <0.0001      |
| Enteroid monolayers                    | 0.23         | 0.343        | -0.028       | 0.908        | 0.00         | >0.999       | 0.39         | 0.099        |
| <i>Correlation tissue vs enteroids</i> | <i>-0.13</i> | <i>0.625</i> | <i>-0.12</i> | <i>0.646</i> | <i>-0.21</i> | <i>0.421</i> | <i>-0.12</i> | <i>0.646</i> |

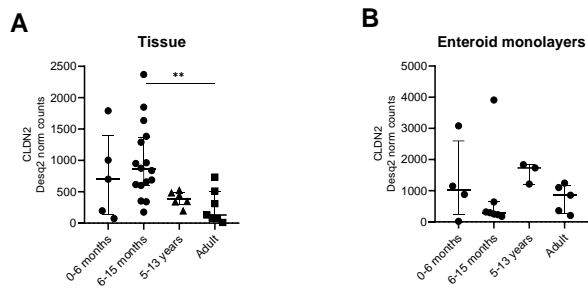

Supplementary Figure 3: normalized count for barrier marker CLDN2 in tissue and enteroid monolayers. Data represented in median  $\pm$  IQR. Statistical test: Kruskal-Wallis, \*\*:  $p=0.001$
